# Supplementary material for: Airway gas temperature within endotracheal tube can be monitored using rapid response thermometer
Source: PubMed Central journal article supplement (PMC8100119; doi:10.1038/s41598-021-88787-3), 2021-05-05
Supplement: 41598_2021_88787_MOESM1_ESM.pdf [file 41598_2021_88787_MOESM1_ESM.pdf]

Title:

Monitoring of airway gas temperatures within endotracheal tube using rapid-response thermometer

Short title: Monitoring of airway gas temperatures

Authors:

Shigeharu Nakane MD<sup>1,2</sup>, Kennosuke Tsuda MD, PhD<sup>1</sup>, Masahiro Kinoshita MD, PhD<sup>3</sup>, Shin Kato MD, PhD<sup>1</sup>, Sachiko Iwata MD, PhD<sup>1</sup>, Yung-Chieh Lin MD<sup>1,4</sup>, Mihoko Mizuno MD<sup>2</sup>, Shinji Saitoh MD, PhD<sup>1</sup> and Osuke Iwata MD, PhD<sup>1</sup> \*

Affiliations:

<sup>1</sup>Department of Paediatrics and Neonatology, Nagoya City University Graduate School of Medical Sciences, Nagoya, Japan.

<sup>2</sup>Department of Paediatrics, Daido Hospital, Nagoya, Japan.

<sup>3</sup>Department of Paediatrics and Child Health, Kurume University School of Medicine, Fukuoka, Japan.

<sup>4</sup>Department of Paediatrics, National Cheng Kung University Hospital, Tainan, Taiwan.

**Supplementary Fig. S1:**

**Relationship between inspiratory  $T_{\text{airway}}$ ,  $T_{\text{tube\_centre}}$  and  $T_{\text{tube\_wall}}$ .**

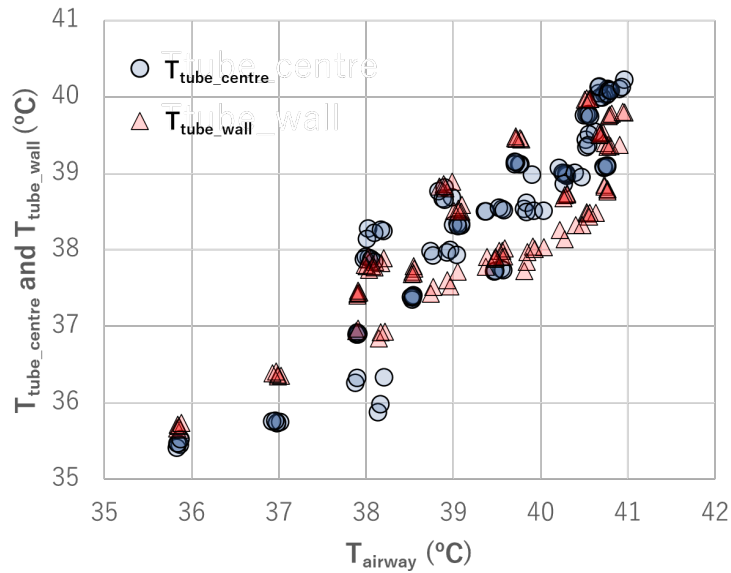

A representative scatter plot depicting the relationship between  $T_{\text{airway}}$ ,  $T_{\text{tube\_centre}}$  and  $T_{\text{tube\_wall}}$  with a representative setting (peak inspiratory pressure, 10 cmH<sub>2</sub>O; tracheal cuff, inflated; inspiratory time, 0.5 sec).

Abbreviations:  $T_{\text{airway}}$ , airway temperature;  $T_{\text{tube\_centre}}$ , temperature at the centre of the endotracheal tube; and  $T_{\text{tube\_wall}}$ , temperature at the wall surface of the endotracheal tube.

**Supplementary Fig. S2:**  
**Data acquisition cycles**

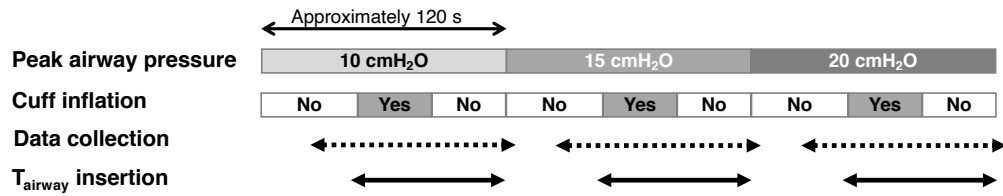

Data acquisition was performed for a set of different conditions which is combinations of peak inspiratory pressures (10, 15 and 20 cmH<sub>2</sub>O) and with/without inflating the endotracheal tube cuff. This cycle was repeated at each inspiration times (0.5 and 1.0 sec).
